# Supplementary material for: Identification of the CKM Gene as a Potential Muscle-Specific Safe Harbor Locus in Pig Genome
Source: MDPI journal article supplement (doi:10.3390/genes13050921), 2022-05-21
Supplement: s1 [file s1]

Figure S1

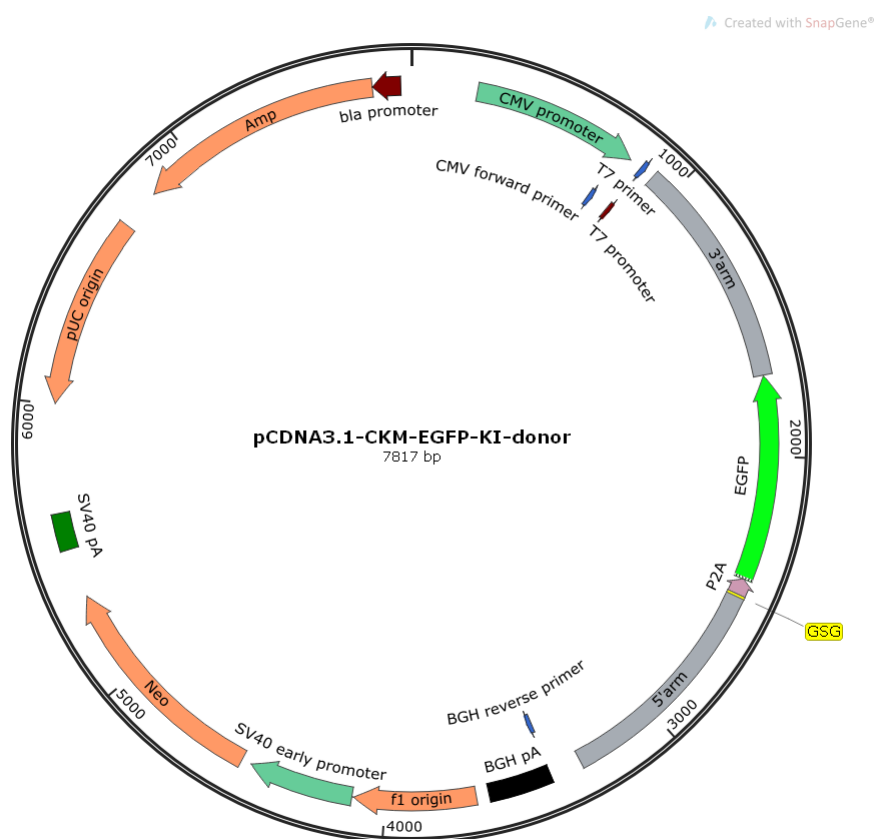

Figure S1. Vector map of targeting donor (pCDNA3.1-CKM-GFP-KI-donor).

Detailed sequence of the donor vector(the sequences of homolog arms and P2A-EGFP fragments are marked in different colors corresponding to the vector map mentioned above):

gacggatcgggagatctccgatcccctatggtgcactctcagtacaatctgctctgatgccgcatagttaagcca  
gtatctgctcctgcttgtgtgttgaggctcgctgagtagtgcgcgagcaaaatttaagctacaacaaggcaagg  
cttgaccgacaattgcatgaagaatctgcttagggtaggcgttttgcgctgcttcgcatgtacgggccagatat  
acgcgttgacattgattattgactagttattaatagtaataacggttcattagttcatagcccatatatggag  
ttccgcgttacataacttaacggtaaatggccccgcttggtgaccgccaacgacccccgccattgacgtcaataa  
tgacgtatgttcccatagtaacgccaatagggaactttccattgacgtcaatgggtggagtattacggtaaactgc  
ccacttggcagtacatcaagtgtatcatatgccaagtacgccccctattgacgtcaatgacggtaaatggccccgc  
tggcattatgcccagtacatgaccttatgggactttctacttggcagtacatctacgtattagtcacgtattacc  
atggtgatgcggttttggcagtacatcaatgggcgtggatagcggtttgactcacggggattccaagtctccacc  
ccattgacgtcaatgggagtttgttttggcaccaaaaatcaacgggactttccaaaatgtcgtacaactccgcccc  
attgacgcaaatgggcggttaggcgtgtacggtgggaggtctatataagcagagctctctggctaactagagaac  
ccactgcttactggcttatcgaaattaatacgaactcactataggagaccaagctggctagcgtttaacttaag  
ctt**ACCACAGCCACAGCAACCGGATCCTTAACCCACTGAGCAAGGCCAGGGAT**  
**TGAACCCGCAACCTCATGGTTCCTAGTCAGATTCGTTAACCACTGAGCCATG**  
**ACGGGAAGTCCCAGATATTTCTTTAAGGTGGGAATTCAGGGTGTAAGGAG**  
**CAAAAGAGTATACAGAGAGATCATGAGAAAAGAACTACAAAGATGAGCCTT**

CAGCAAATGGTATGCATTTGTTTGAAGACTTGCATATAAAGGAGAGTATTCT  
AGGAGACGTGGGGAGCCATGGTAGGTTCTTGAGCAAAGTAAGTGAAGTTTA  
TGGGGGAAAAACAGGTAGCACCTGCAGAGGGCTGAAGTCTGGAGGCTAAT  
GAAAAGGTTAATGAGATAGATCATGATGAGCTGTATGGGAGATCTCAACCT  
GGGAGCCAAGTTCAAGTCTCAGACATTTCAATTTGGCCTGTTTCTTCCTCATG  
TGGACCCTGTGTTTGAGATCTAACCTGAATGACTGGCAGCTGAGGTTGGGA  
AGGACCCAAGCTTGGTTGTGGGACTCTGGCCACACCTGAGTCTCGGATTCC  
ATGCAGAGCCTTGTAATGTTTGAATTAGACTCTGTAGGGTAACTGTGCCTCA  
TTCTAGAGAAGGGATAAATATGCCTAGCCCTAGGACATGGCTAGAGAGGCA  
TGGCGGCTTCGAGGTCACACCGTAGCCAATTGTGAAAGTCCCTCCTCCTCCC  
CCAATAACTATGGCATCAATGCTAAGGCCACCATTGCTTTTTATTTGTTGCTTT  
GAGTGGAGAAAAGCATGAGCTCCAAATGTGTTACTTGTACAGCTCGTCCAT  
GCCGAGAGTGATCCCGGGCGGCGGTACGAACCTCCAGCAGGACCATGTGATC  
GCGCTTCTCGTTGGGGTCTTTGCTCAGGGCGGACTGGGTGCTCAGGTAGTG  
GTTGTCGGGCAGCAGCACGGGGCCGTCGCCGATGGGGGTGTTCTGCTGGTA  
GTGGTCGGCGAGCTGCACGCTGCCGTCCTCGATGTTGTGGCGGATCTTGAA  
GTTACCTTGATGCCGTTCTTCTGCTTGTGCGCCATGATATAGACGTTGTGG  
CTGTTGTAGTTGTACTCCAGCTTGTGCCCCAGGATGTTGCCGTCCTCCTTGA  
AGTCGATGCCCTTCAGCTCGATGCGGTTACACAGGGTGTGCGCCCTCGAACTT  
CACCTCGGCGCGGGTCTTGTAGTTGCCGTCGTCCTTGAAGAAGATGGTGCG  
CTCCTGGACGTAGCCTTCGGGCATGGCGGACTTGAAGAAGTCGTGCTGCTT  
CATGTGGTCGGGGTAGCGGCTGAAGCACTGCACGCCGTAGGTCAGGGTGGT  
CACGAGGGTGGGCCAGGGCACGGGCAGCTTGCCGGTGGTGCAGATGAACT  
TCAGGGTCAGCTTGCCGTAGGTGGCATCGCCCTCGCCCTCGCCGGACACGC  
TGAACCTTGTTGGCCGTTTACGTCGCCGTCCAGCTCGACCAGGATGGGCACCA  
CCCCGGTGAACAGCTCCTCGCCCTTGCTCACCATTGGGGCCGGGGTTCTCCTC  
CACGTCGCCGGCCTGCTTCAGCAGGCTGAAGTTGGTGGCTCCGCTTCCGGG  
AGCTTCTGTTAACCAGAGCTCCTGGTGGTGGGCGGAGCTCAGGGATAATGA  
AAGGTGAATGTGAAGGGAGGGTTTTTCATTGGCCAGAACCCAGAGAATGGAG  
CCCATTTGGCTGGAACCTCTGGTTGGAACCTGGAATTCGATGAAGAGTGGGGAG  
AGAGCCCCGGGTTGACTGACCCTTGTACGCCAGATTCTGGAAGGAAGGGGC  
GGGCCTTCGATGGGCTTGGTCCTCCCTTTGCCCTGGGCTCCAGCAGTCGGCT  
GGGAGCCTACTTCTGGGCGGGGATCATGTGTCGTCGATGGACTGGCCTTTTTTC  
CAGCTTCTTCTCCATCTCCACCATGAGCTTCACACCATCCACCACCAGCTGCA  
CCTGTTCTACCTCCGACGAGCCCAGCCGATCGGCGTTGGATACATCGAACAC  
TGAGCCCACAGCGGCTGTGTCCACGCCACCTGCGGGAGGAGGAGGCCGCGG  
CATGAGAAGGGAGCAGGGATGCAGGAGCGGCCCCCGTGCCAAGTGCGACA  
GCCACACGTACTGAGTGAGTGCCTACTGTGTATGGGTAAAGTGCACGCAGA  
GTTTCCTCAGCATCTGTCTTTTACGGGGCCACATCTCTGGCTGTAGGTACC  
CCACCCTTCAACCATCCAACAAGAAAATACAGCGTGATGGGTAGGAGAGTC  
GAGCTTTGGAGCCGAGCTGCCTGGGGTTGAATCCAGACCCTCCTCCCTTTA  
CAAATAGGAAAATAAGGCCCCGAGGCGGCCAGGGACATACTCGGTGTGTAT  
TACACAGCCATGATGATGTACTCATTCgggtaccgagctcggtaccactagtcagtggtgg  
aattctgcagatatccagcacagtggcgccgctcgagtctagagggccggttaaaccgctgatcagcctcga

ctgtgccttctagttgccagccatctgttgtttgccccctccccgtgccttcttgaccctggaaggtgccactceca  
 ctgtcctttcctaataaaatgaggaaattgcacgcattgtctgagtaggtgtcattctattctgggggggtgggggtg  
 gggcaggacagcaagggggaggattgggaagacaatagcaggcatgctggggatgcggtgggctctatggctt  
 ctgaggcggaagaaccagctggggtctaggggggtatccccacgcgcctgtagcggcgcatthaagcgcggc  
 ggggtgtggtggttacgcgcagcgtgaccgctacacttgccagcgccttagcggcgctcctttcgcttttccctt  
 ctttctcgccacgttcgccggtttccccgtcaagctctaaatcgggggctcccttaggggtccgatttagtgcttt  
 acggcacctcgaccccaaaaaacttgattaggggtgatggttcacgtagtgggcatcgccctgatagacgggtttt  
 cgcccttgacgttggagtccacgttcttaatagtggactctgttccaaactggaacaacactcaaccctatctcg  
 gtctattcttttgatttataagggttttgcgatttcggcctattgggttaaaaaatgagctgatttaacaaaaatta  
 acgcgaattaattctgtggaatgtgtgtcagttaggggtgtgaaagtccccagggtccccagcaggcagaagtat  
 gcaaagcatgcattcaattagtcagcaaccaggtgtgaaagtccccagggtccccagcaggcagaagtatgc  
 aaagcatgcattcaattagtcagcaaccatagtcggccctaaactccgcccattcccggccctaaactccgcccag  
 ttccgcccattctcggcccc

**Figure S2**

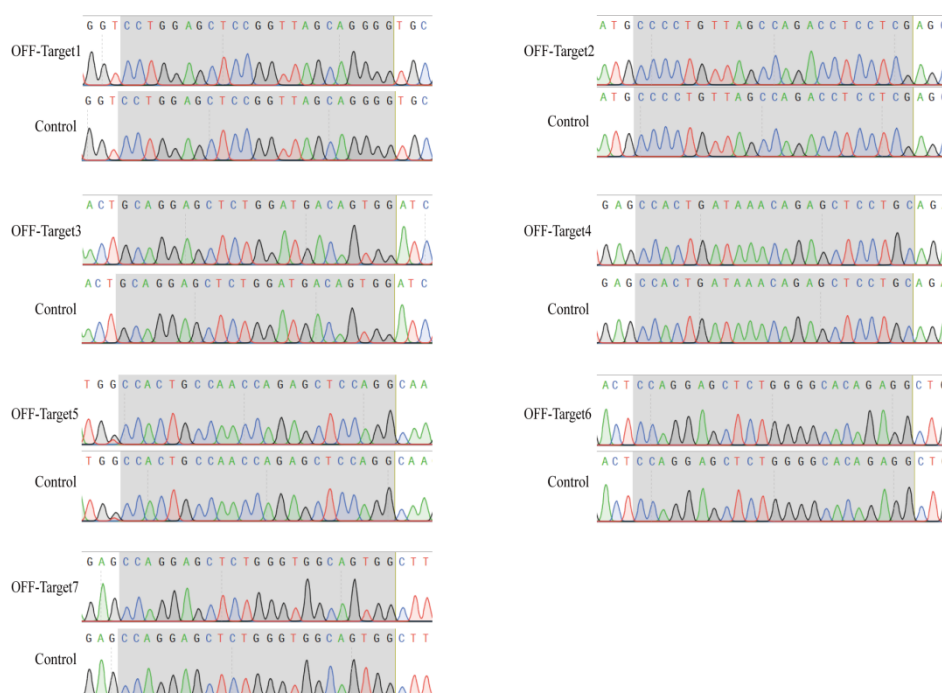

**Figure S2.** Sequencing information of 7 potential OFF-Target sites.

**Figure S3**

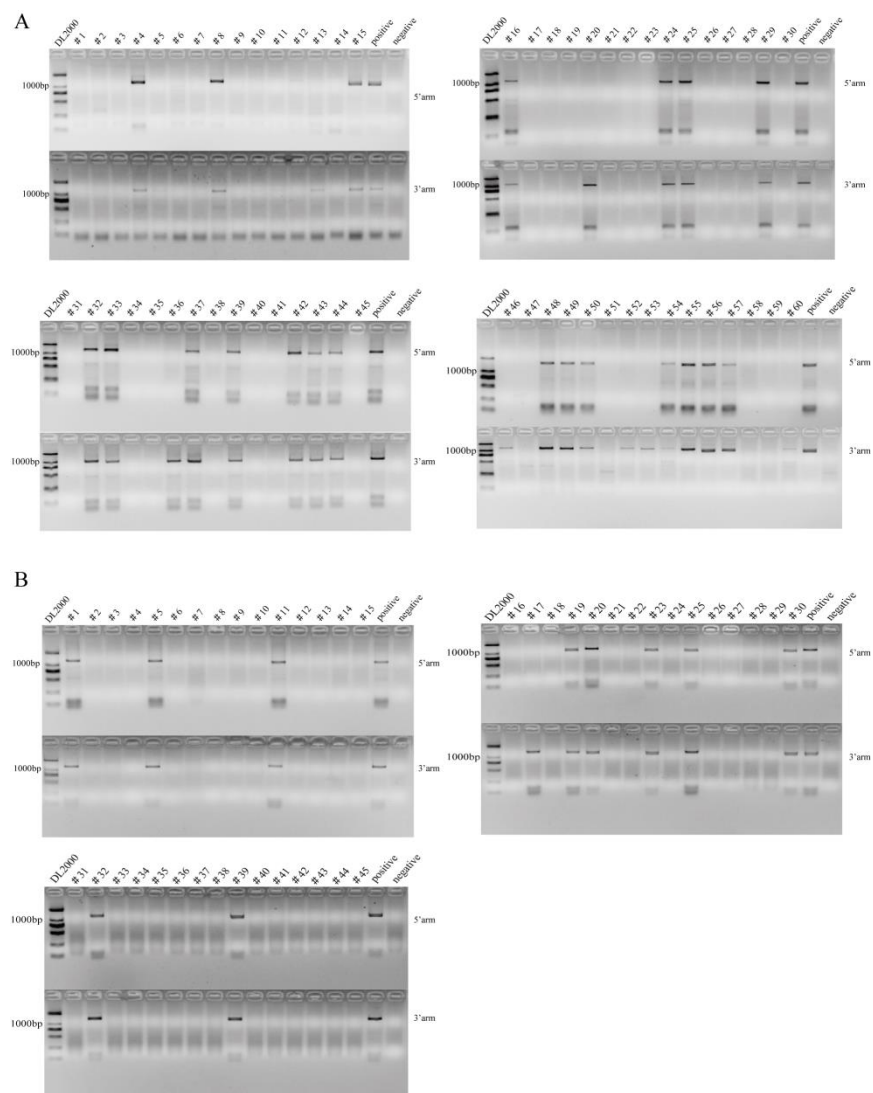

**Figure S3.** PCR amplification of homologous arm sequences of 60 pk-15 monoclonal cells(A) and 45 3D4/21 monoclonal cells(B).

**Table S1.** All primers used in this study.

| Primer           | Sequence (5'-3')         |
|------------------|--------------------------|
| CKM-sgR-F        | caccCCAGGAGCTCTGGTTAACAG |
| CKM-sgR-R        | aaacCTGTTAACCAGAGCTCCTGG |
| CKM-offtarget1-F | ACAGCGAAGTCCACAAAGGT     |
| CKM-offtarget1-R | ACCCACCATCCCTAAAAAGGT    |
| CKM-offtarget2-F | CTGAGCCCCTGAGAGGTACT     |
| CKM-offtarget2-R | AACTAACAGAGGCACGGTGG     |
| CKM-offtarget3-F | AGACAGGGTGTACCTTTCCAT    |
| CKM-offtarget3-R | GCACTGTAAATGGCAGAGCG     |
| CKM-offtarget4-F | TGAAACCCAGCAAACCTGGA     |
| CKM-offtarget4-R | GAGTTGACAGCACTGACCCA     |
| CKM-offtarget5-F | GCCGACTTTAGGCTGTGTCT     |
| CKM-offtarget5-R | GTGTCCAGCAAGACCACTGA     |
| CKM-offtarget6-F | CGAGCTGCACCATTCAACAAC    |
| CKM-offtarget6-R | ACATCAGAAGAGGCGCTCAC     |
| CKM-offtarget7-F | GTACCAGATGGCGGTACCTT     |
| CKM-offtarget7-R | CAGGGAGGAAGACAGACCAC     |
| q-PCR-F          | CCTCAGCAAGCACAACAACC     |
| q-PCR-R          | CCGTGTCGGTCTTGGATGAT     |
| F1               | TGATCCCCGCCCAGAAGTA      |
| R1               | GAGTCTCGGATTCCATGCAGA    |
| F2               | GCATCCCAAGTTCGAGGAGA     |
| R2               | GCTGAACTTGTGGCCGTTTAC    |
| F3               | AGATCCGCCACAACATCGAG     |
| R3               | ATGATTGACGTGGCCAACAC     |
